# Supplementary material for: Valorization of Common (Fagopyrum esculentum Moench.) and Tartary (Fagopyrum tataricum Gaertn.) Buckwheat in Gluten-Free Polenta Samples: Chemical-Physical and Sensory Characterization
Source: MDPI journal article supplement (doi:10.3390/foods11213442), 2022-10-30
Supplement: s1 [file s1]

**Supplementary table S1.** Attributes used for sensory profile with their definitions and reference standards.

| Sensory Descriptor        | Definition                                                                                      | Reference Standard                                                                                                    |
|---------------------------|-------------------------------------------------------------------------------------------------|-----------------------------------------------------------------------------------------------------------------------|
| <b>APPEARANCE</b>         |                                                                                                 |                                                                                                                       |
| Ochre color               | Characteristic perceived through the sense of sight referring to the yellow-ochre color         | Ochre acrylic color (n° 14131) (Maimeri S.p.A, Mediglia, Italy)                                                       |
| <b>TASTE</b>              |                                                                                                 |                                                                                                                       |
| Bitter                    | One of the basic tastes caused by bitter compounds (e.g. caffeine) perceived in the oral cavity | 0.27 g of caffeine monohydrate (Sigma Aldrich srl, Milano, Italy) in 500 mL of still mineral water (Levissima S.p.A.) |
| <b>TEXTURE</b>            |                                                                                                 |                                                                                                                       |
| Firmness                  | Force required to compress the sample between the molars.                                       | Mozzarella cheese for pizza (biG, S.r.l, Milano, Italy)                                                               |
| Gumminess                 | Time required to disintegrate a semi-solid food to a state ready for swallowing                 | Scamorza Cheese (Esselunga, S.p.A, Limito di Pioltello, Italy)                                                        |
| Moisture                  | Perceived degree of humidity while chewing                                                      | Primo Sale cheese (Carrefour, GS S.p.A., Milano, Italy)                                                               |
| <b>TACTILE SENSATIONS</b> |                                                                                                 |                                                                                                                       |
| Astringent                | Tactile sensation of dryness and puckering perceived in the oral cavity                         | 2.00 g of Potassium alum (Sigma Aldrich srl, Milano, Italy) in 500 mL of still mineral water (Levissima S.p.A.)       |
