# Supplementary material for: Valorization of Common (Fagopyrum esculentum Moench.) and Tartary (Fagopyrum tataricum Gaertn.) Buckwheat in Gluten-Free Polenta Samples: Chemical-Physical and Sensory Characterization
Source: MDPI journal article supplement (doi:10.3390/foods11213442), 2022-10-30
Supplement: s1 [file s1]

**Supplementary Figure S1.** Mean values for the interactions Judges  $\times$  Replicates (J $\times$ R), Judges  $\times$  Product (J $\times$ P), and Product  $\times$  Replicates (P $\times$ R) for the sensory attributes:

- a) Ochre color
- b) Bitter taste
- c) Astringency
- d) Gumminess
- e) Moisture
- f) Firmness

a)

INTERACTION J × R

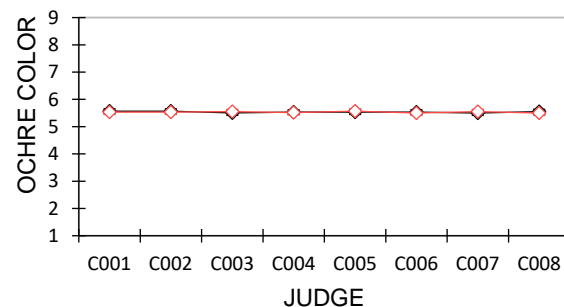

INTERACTION J × P

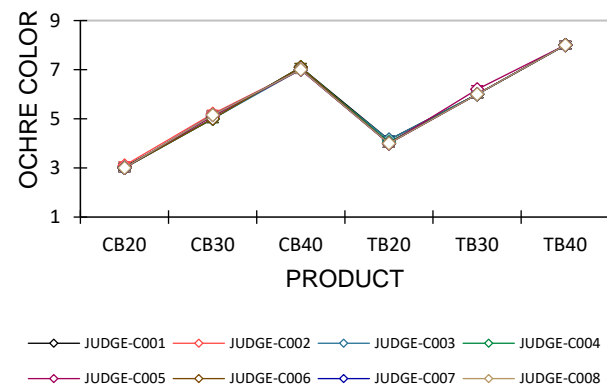

INTERACTION P × R

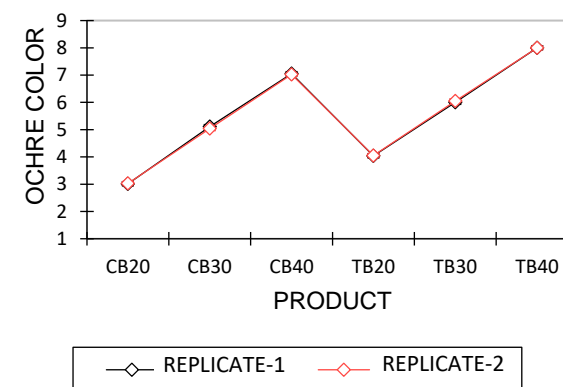

b)

INTERACTION J × R

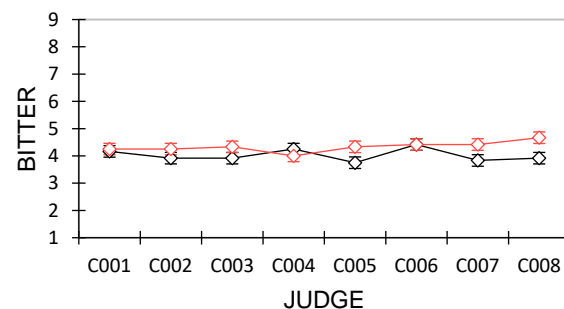

INTERACTION J × P

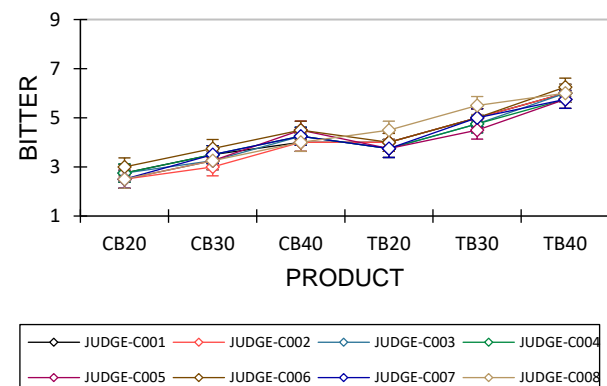

INTERACTION P × R

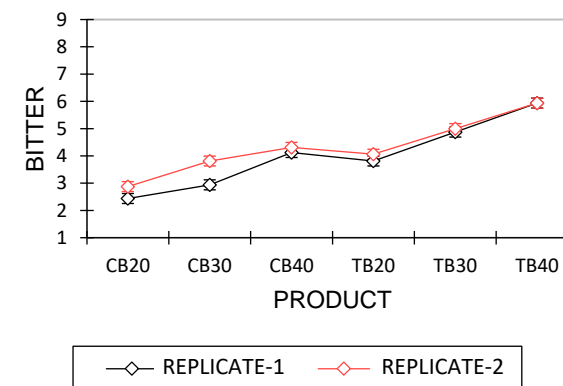

c)

INTERACTION J × R

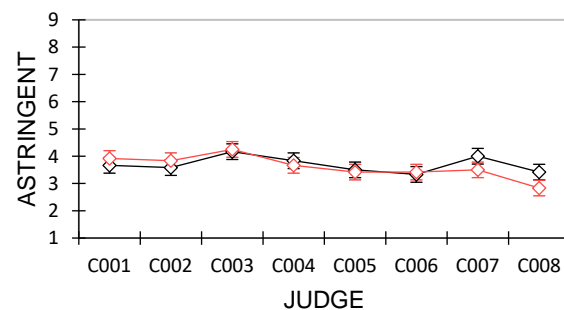

INTERACTION J × P

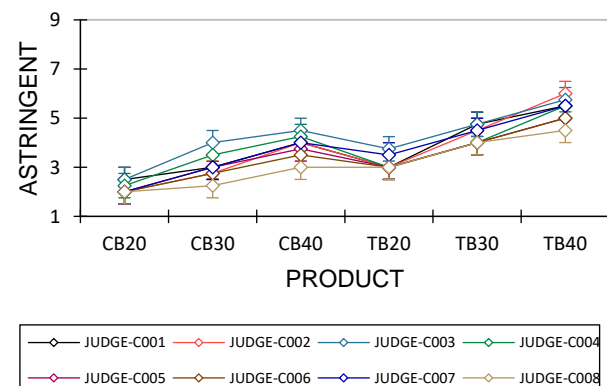

INTERACTION P × R

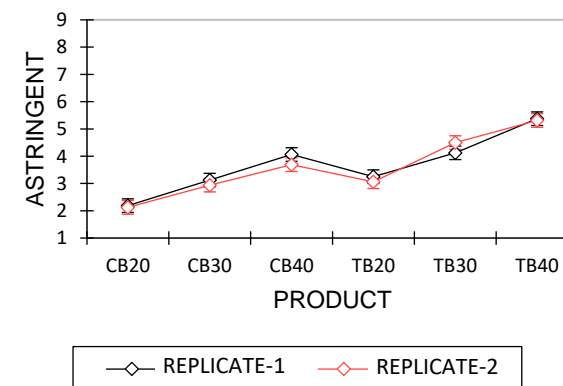

d)

INTERACTION J × R

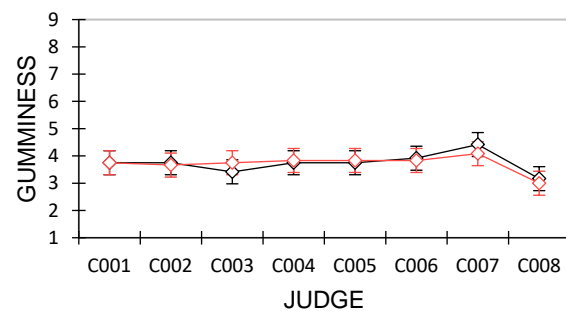

—◇— REPLICATE-1    —◇— REPLICATE-2

INTERACTION J × P

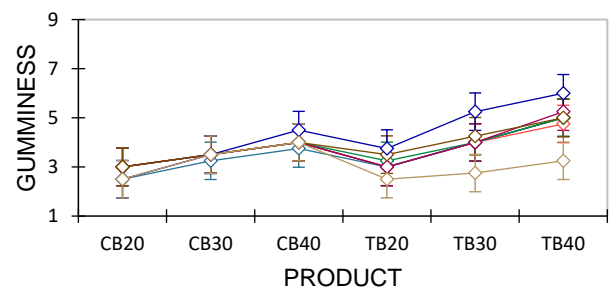

—◇— JUDGE-C001    —◇— JUDGE-C002    —◇— JUDGE-C003    —◇— JUDGE-C004  
—◇— JUDGE-C005    —◇— JUDGE-C006    —◇— JUDGE-C007    —◇— JUDGE-C008

INTERACTION P × R

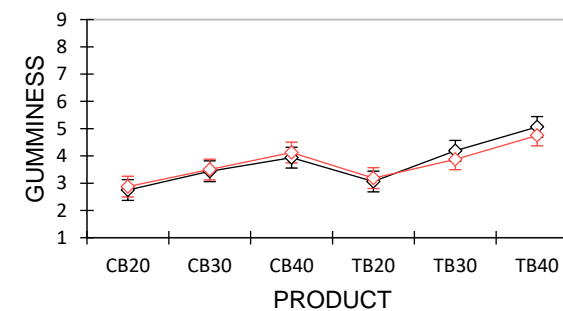

—◇— REPLICATE-1    —◇— REPLICATE-2

e)

INTERACTION J × R

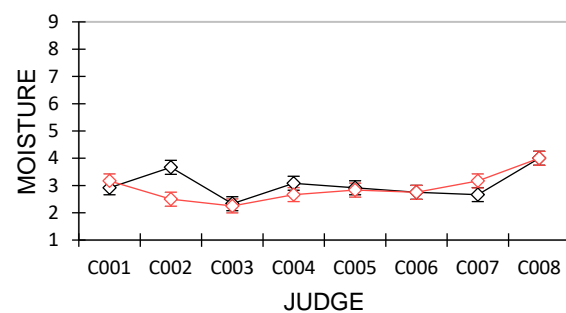

—◇— REPLICATE-1    —◇— REPLICATE-2

INTERACTION J × P

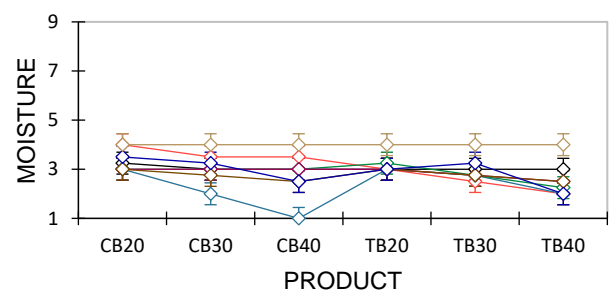

—◇— JUDGE-C001    —◇— JUDGE-C002    —◇— JUDGE-C003    —◇— JUDGE-C004  
—◇— JUDGE-C005    —◇— JUDGE-C006    —◇— JUDGE-C007    —◇— JUDGE-C008

INTERACTION P × R

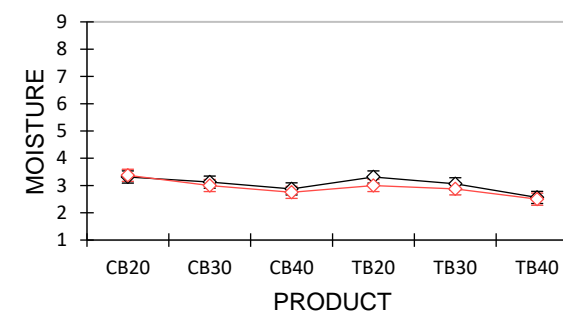

—◇— REPLICATE-1    —◇— REPLICATE-2

f)

INTERACTION J × R

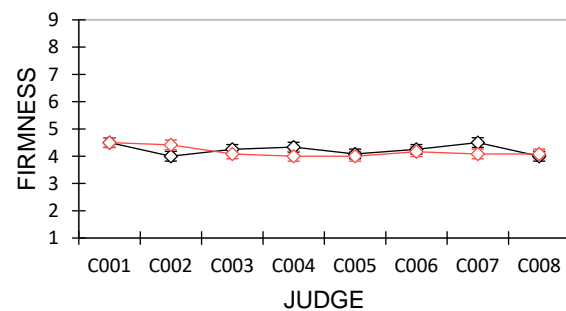

—◇— REPLICATE-1    —◇— REPLICATE-2

INTERACTION J × P

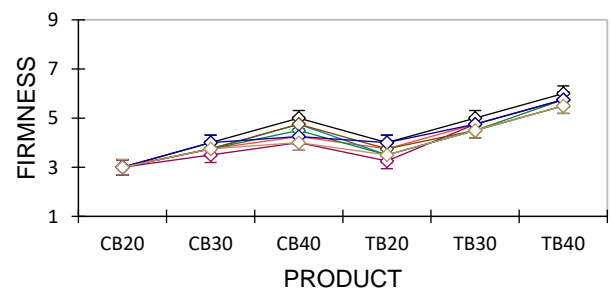

—◇— JUDGE-C001    —◇— JUDGE-C002    —◇— JUDGE-C003    —◇— JUDGE-C004  
—◇— JUDGE-C005    —◇— JUDGE-C006    —◇— JUDGE-C007    —◇— JUDGE-C008

INTERACTION P × R

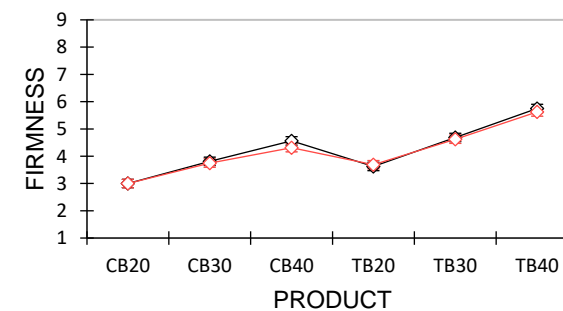

—◇— REPLICATE-1    —◇— REPLICATE-2
